# Supplementary material
Source: PubMed Central journal article supplement (PMC7592224)
Supplement: JVI.01456-20-s0001.pdf [file JVI.01456-20-s0001.pdf]

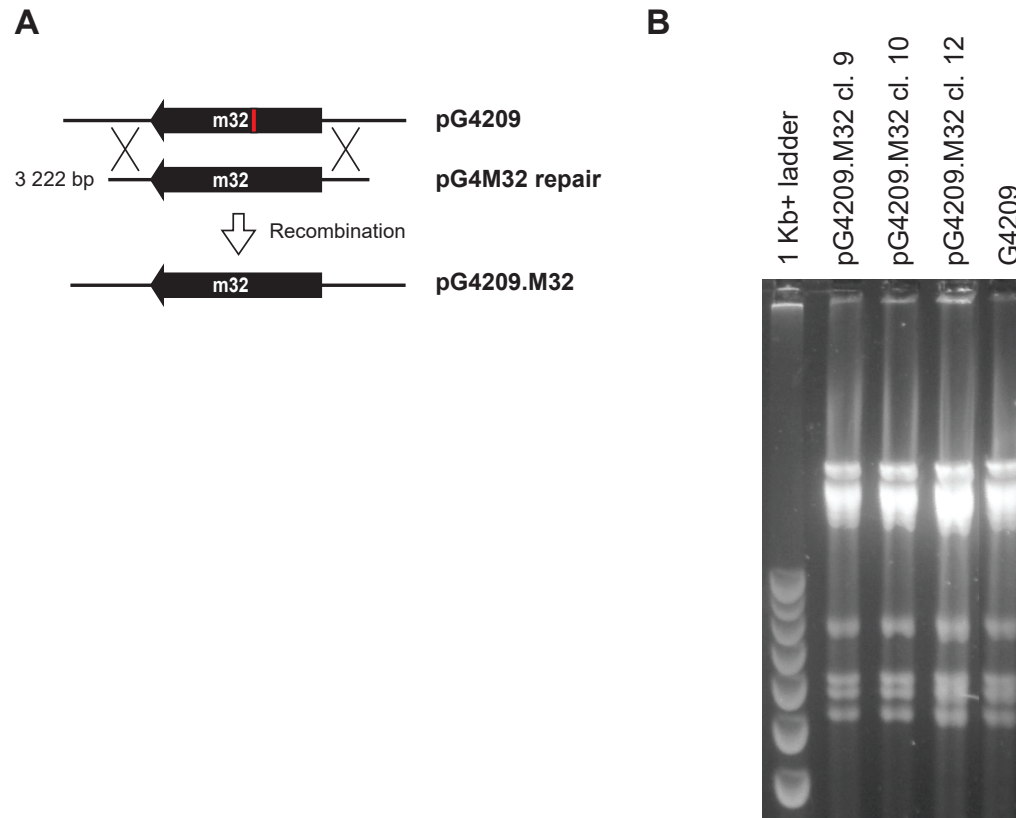

**Supplementary Figure 1. Repair of M32. A.** Schematic of two-step allele replacement-based repair of the single G to A substitution at 40 711 (indicated by red line). Recombination between repair plasmid pG4M32repair and pG4209 leads to repair of the indicated mutation and production of pg4209.M32. **B.** HindIII RFLP of three repaired clones, Cl9, Cl10 and Cl12 of G4209.M32. Repair was confirmed by sequence analysis.

|       |            |            |            |            |            |            |            |            |     |
|-------|------------|------------|------------|------------|------------|------------|------------|------------|-----|
| Smith | MSPPLLFTIS | LFFALGSRPL | AGYSNLAVWY | SDYENGTYSY | EFVLRPNM   | PLPFTNCYLP | EKIKSSATVT | PNGTILLHDN | 80  |
| AA18D |            |            |            |            |            |            |            | F          | 80  |
| C4A   |            |            | N          |            |            |            |            |            | 80  |
| C4B   |            |            | N          |            |            |            |            |            | 80  |
| C4C   |            |            |            |            | M          |            |            |            | 80  |
| C4D   |            |            |            |            |            |            |            |            | 80  |
| G4    | F          |            |            |            |            |            |            | F          | 80  |
| K181  |            |            |            |            |            |            |            |            | 80  |
| N07   |            |            |            |            |            |            |            | F          | 80  |
| N1    |            |            |            |            | M          |            |            |            | 80  |
| WP15B |            |            | N          |            |            |            |            |            | 80  |
| Smith | YLTTKLVEDS | STGKRHRRLS | FRDPEFEKRH | PCLYCERPGD | SMDMERCLMC | KDTTMAVLLK | DLHTPKRRDF | SPMLVRATVE | 160 |
| AA18D |            | W          |            |            |            | V          | S          |            | 160 |
| C4A   |            |            |            |            |            |            | S          |            | 160 |
| C4B   |            |            |            |            |            |            | S          |            | 160 |
| C4C   |            |            |            |            |            |            | S          |            | 160 |
| C4D   |            | W H        |            |            |            |            |            |            | 159 |
| G4    |            | W          |            |            |            | V          | S          |            | 160 |
| K181  |            |            |            |            |            |            |            |            | 160 |
| N07   |            |            |            |            |            | V          | S          |            | 160 |
| N1    |            | W H        |            |            |            | V          | S          |            | 159 |
| WP15B |            |            |            |            |            | V          | S          |            | 160 |
| Smith | TVNHRPYFTC | RFRVTPDTQK | IETAWLNDDC | TFGAKTKDPI | EACAKTASYK | KSIREGRYVT | MSAKVKPGDP | RTCRVCLLKT | 240 |
| AA18D |            | Q          |            |            |            |            |            |            | 240 |
| C4A   |            | Q          |            | E          | V          |            |            |            | 240 |
| C4B   |            | Q          |            | E          | V          |            |            |            | 240 |
| C4C   |            | Q          |            |            | D          |            |            |            | 240 |
| C4D   |            | Q          |            |            |            |            |            |            | 239 |
| G4    |            | Q          |            |            |            |            |            |            | 240 |
| K181  |            |            |            |            |            |            |            |            | 240 |
| N07   |            | Q          |            | E          |            |            |            |            | 240 |
| N1    |            | Q          |            | E          |            |            |            |            | 239 |
| WP15B |            | Q          |            |            |            |            |            |            | 240 |
| Smith | DNKYVLMARP | CLTDKRHQEY | IRNVRIVHAL | VISWAVAIA  | LVGFAAVRLL | LSLDSVARLV | KKMFAVRILP | LPPLLVVVWY | 320 |
| AA18D |            | R          |            |            |            |            |            |            | 320 |
| C4A   |            | R          |            |            |            |            |            |            | 320 |
| C4B   |            | R          |            |            |            |            |            |            | 320 |
| C4C   |            | R          |            |            |            |            |            |            | 318 |
| C4D   |            | R          |            |            |            |            |            |            | 319 |
| G4    |            | R          |            |            |            |            |            | L          | 320 |
| K181  |            | R          |            |            |            |            |            |            | 320 |
| N07   |            | R          |            |            |            |            |            |            | 318 |
| N1    |            | R          |            |            |            |            |            |            | 319 |
| WP15B |            | R          |            |            |            |            |            |            | 320 |
| Smith | VLAAGDTVAV | TDRDGVLAVE | SVLLSGLELG | FNHRSLNASQ | MKLALER*   |            |            |            | 368 |
| AA18D |            | T          |            |            |            |            |            |            | 368 |
| C4A   |            |            |            |            |            |            |            |            | 368 |
| C4B   |            |            |            |            |            |            |            |            | 368 |
| C4C   |            |            | F          |            |            |            |            |            | 366 |
| C4D   |            |            |            |            |            |            |            |            | 367 |
| G4    |            |            |            |            |            |            |            |            | 368 |
| K181  |            |            |            |            |            |            |            |            | 368 |
| N07   |            |            | F          |            |            |            |            |            | 366 |
| N1    |            |            |            |            |            |            |            |            | 367 |
| WP15B |            |            |            |            |            |            |            |            | 368 |

**Supplementary Figure 2. Conservation of m133 sequence in MCMV.** The annotated m133 ORF is present in all MCMV strains and is predicted to encode a protein of between 366 and 368 AA. Sequences are highly conserved at the AA level and range from 100% sequence identity (C4A versus C4B) and 97.01% sequence similarity (C4C versus G4).

|       |            |            |            |            |            |            |            |            |            |     |
|-------|------------|------------|------------|------------|------------|------------|------------|------------|------------|-----|
| Smith | MSDVQGHNDG | GLTKGFTHAQ | TARFFAYVGP | GHGGDRQSPA | LFHVPVSRNS | GHPEDRDGVV | ERRLHLRRQN | ERSDRGLRQN | GQLQEIHTRG | 90  |
| AA18D | .....      | .S...L...  | .....      | .....      | .....      | .....      | ...Y....   | .....      | .....      | 90  |
| C4A   | .....      | .....L...  | .....      | .....      | .....      | .....      | ...V....   | .....      | .....      | 90  |
| C4B   | .....      | .....L...  | .....      | .....      | .....      | R.....     | ...V....   | .....      | .....      | 90  |
| C4C   | .....      | .....L...  | .....      | .....      | .....      | .....      | ...Y....   | ...C....   | ...D....   | 90  |
| C4D   | .....      | .....L...  | .....      | .....      | .....      | .....      | K...Y...   | .....      | .....      | 90  |
| G4    | .....      | .S...L...  | .....      | .....      | .....      | .....      | ...Y....   | .....      | .....      | 90  |
| K181  | .....      | .....L...  | .....      | .....      | .....      | .....      | .....      | .....      | ...D....   | 90  |
| NO7   | .....      | .S...L...  | .....      | .....      | .....      | .....      | ...V....   | .....      | ...D....   | 90  |
| N1    | .....      | .S...L...  | .....      | .....      | .....      | .....      | ...V....   | .....      | ...D....   | 90  |
| WP15B | .....      | .S...L...  | .....      | .....      | .....      | .....      | ...Y....   | .....      | .....      | 90  |
| Smith | KIRDHERQGE | TRRPAHLPRM | PAEDGQQVRA | DGASMPDGQA | APGIHPKRAH | RARVGDQRVG | GRDRPGGLRR | RAPAIKPGQR | RPAGEKNVRG | 180 |
| AA18D | .....      | .....V...  | .....      | .....      | .....      | .....      | .....      | .....      | .....      | 180 |
| C4A   | .....      | .....V...  | .....      | .....      | .....      | .....      | .....      | .....      | .....      | 180 |
| C4B   | .....      | .....V...  | .....      | .....      | .....      | .....      | .....      | .....      | .....      | 180 |
| C4C   | .....      | ...Y...V   | ...P....   | .....      | .....      | .....      | .....      | .....      | .....      | 180 |
| C4D   | .....      | .....V...  | .....      | .....      | .....      | .....      | .....      | .....      | .....      | 180 |
| G4    | .....      | .....V...  | .....      | .....      | .....      | .....      | .....      | .....      | .....      | 180 |
| K181  | .....      | .....V...  | .....      | .....      | .....      | .....      | .....      | .....      | .....      | 180 |
| NO7   | .....      | .....V...  | .....      | .....      | .....      | .....      | .....      | .....      | .....      | 180 |
| N1    | .....      | .....V...  | .....      | .....      | .....      | .....      | .....      | .....      | .....      | 180 |
| WP15B | .....      | .....V...  | .....      | .....      | .....      | .....      | .....      | .....      | .....      | 180 |
| Smith | TYTAVTVTAG | RGVVRARRRR | HGRRDGPRRG | AGRGERPALR | ARAGVQPSIP | ERVPNETGAG | EVALPRNGRV | PRRALSLTNH | PPALTCARFC | 270 |
| AA18D | .....      | .....H...  | .....      | .....      | .....      | .....T...  | .....      | ...SD-     | .....      | 259 |
| C4A   | .....      | .....      | .....      | .....      | .....      | .....      | .....      | .....      | .....      | 270 |
| C4B   | .....      | .....      | .....      | .....      | .....      | .....      | .....      | .....      | .....      | 270 |
| C4C   | .....      | .....*     | .....      | .....      | .....      | .....      | .....      | .....      | .....      | 198 |
| C4D   | .....      | .....      | .....      | .....      | .....      | .....      | .....      | .....      | .....      | 270 |
| G4    | .....      | .V.....    | .....      | .....      | .....      | .....      | .....      | .....      | .....      | 270 |
| K181  | .....      | .....      | .....      | .....      | .....      | .....      | .....      | .....      | .....      | 270 |
| NO7   | .....      | .....      | .....      | ...V...    | .....      | .....      | .....      | ...D---    | .....      | 255 |
| N1    | .....      | .....      | .....      | .....      | .....      | .....      | .....      | .....      | .....      | 269 |
| WP15B | .....      | .....      | .....      | .....      | .....      | .....      | .....      | .....      | .....      | 270 |
| Smith | LSGWI      | 275        | .....      | .....      | .....      | .....      | .....      | .....      | .....      | 275 |
| AA18D | -----      | 259        | .....      | .....      | .....      | .....      | .....      | .....      | .....      | 275 |
| C4A   | .....      | 275        | .....      | .....      | .....      | .....      | .....      | .....      | .....      | 275 |
| C4B   | .....      | 275        | .....      | .....      | .....      | .....      | .....      | .....      | .....      | 275 |
| C4C   | -----      | 198        | .....      | .....      | .....      | .....      | .....      | .....      | .....      | 275 |
| C4D   | .....      | 275        | .....      | .....      | .....      | .....      | .....      | .....      | .....      | 275 |
| G4    | .....      | 275        | .....      | .....      | .....      | .....      | .....      | .....      | .....      | 275 |
| K181  | .....      | 275        | .....      | .....      | .....      | .....      | .....      | .....      | .....      | 275 |
| NO7   | -----      | 255        | .....      | .....      | .....      | .....      | .....      | .....      | .....      | 275 |
| N1    | .....      | 274        | .....      | .....      | .....      | .....      | .....      | .....      | .....      | 275 |
| WP15B | .....      | 275        | .....      | .....      | .....      | .....      | .....      | .....      | .....      | 275 |

**Supplementary Figure 3. Conservation of m132.1 sequence in MCMV.** The annotated gene m132.1 is present in all MCMV strains. Across the sequenced MCMV strains, m132.1 shows sequence length polymorphism with the smallest protein, encoded by C4C, predicted to be 197 AA. Most m132.1 ORFs are predicted to encode a protein of 275 AA. Sequence conservation is most pronounced across the amino terminus of the protein as length variation is due to truncation of the carboxy terminus in AA18D, C4C and NO7. Overall AA sequence similarity remains high from 99.64% (C4A versus C4B and G4 versus WP15B) to 69.45% (C4B versus C4C and C4C versus Smith).

|       |            |            |            |            |            |            |           |       |     |
|-------|------------|------------|------------|------------|------------|------------|-----------|-------|-----|
|       |            |            | 20<br>     |            | 40<br>     |            | 60<br>    |       |     |
| Smith | MFAVRILPLP | LPLVVVWYVL | AAGDTVAVTD | RDGVLAVESV | LLSGLELGFN | HRSLNASQMK | LALER     | LDIGG | 70  |
| AA18D | .....      | .....      | T.....     | .....      | .....      | .....      | .....     | ..... | 70  |
| C4A   | .....      | .....      | .....      | .....      | .....      | .....      | .....     | ..... | 70  |
| C4B   | .....      | .....      | .....      | .....      | .....      | .....      | .....     | ..... | 70  |
| C4C   | .....      | ..         | .....      | .....      | F.....     | .....      | .....     | ..... | 68  |
| C4D   | .....      | .....      | .....      | .....      | .....      | .....      | .....     | ..... | 70  |
| G4    | .....      | L.....     | .....      | .....      | .....      | .....      | .....     | ..... | 70  |
| K181  | .....      | .....      | .....      | .....      | .....      | .....      | .....     | ..... | 70  |
| NO7   | .....      | ..         | .....      | .....      | F.....     | .....      | .....     | ..... | 68  |
| N1    | .....      | .....      | .....      | .....      | .....      | .....      | .....     | ..... | 70  |
| WP15B | .....      | .....      | .....      | .....      | .....      | .....      | .....     | ..... | 70  |
|       |            | 80<br>     |            | 100<br>    |            | 120<br>    |           |       |     |
| Smith | YLKTIDVLVG | SSDAREVRQG | RENRTVVRPV | LGSYNARVAK | MTADLSASTQ | PGKKVLNARV | FISVQDDV* |       | 139 |
| AA18D | .....      | .....      | .....      | .....      | .....      | .....      | .....     | ..... | 139 |
| C4A   | .....      | .....      | .....      | .....      | .....      | .....      | .....     | ..... | 139 |
| C4B   | .....      | .....      | .....      | .....      | .....      | .....      | .....     | ..... | 139 |
| C4C   | .....      | .....      | I.....     | .....      | .....      | .....      | .....     | ..... | 137 |
| C4D   | .....      | .....      | .....      | .....      | .....      | .....      | .....     | ..... | 139 |
| G4    | .....      | .....      | .....      | .....      | .....      | .....      | .....     | ..... | 139 |
| K181  | .....      | .....      | .....      | .....      | .....      | .....      | .....     | ..... | 139 |
| NO7   | .....      | K.....     | .....      | .....      | .....      | .....      | .....     | ..... | 137 |
| N1    | .....      | .....      | .....      | .....      | .....      | .....      | .....     | ..... | 139 |
| WP15B | .....      | .....      | .....      | .....      | .....      | .....      | .....     | ..... | 139 |

**Supplementary Figure 4. Conservation of sgg1.1 sequence in MCMV.** The novel two exon sgg1.1 gene is conserved across all MCMV strains sequenced to date, encoding a predicted protein of between 136 to 138 AA. Sequences are highly conserved at the AA level and range from 100% sequence identity (Smith, WP15B, N1, K181, C4D, C4B and C4A) to 96% similarity (e.g. NO7 versus AA18D). Red box denotes boundary of exon 2.

|       |               |             |             |            |             |             |            |             |            |     |
|-------|---------------|-------------|-------------|------------|-------------|-------------|------------|-------------|------------|-----|
|       |               | 20          |             | 40         |             | 60          |            | 80          |            |     |
| Smith | MSPPLLFTIS    | LFFALGSRPL  | AGYSNLAVWY  | SDYENGTYS  | EFVLPRPNM   | PLPFTNCYLP  | EKIKSSATVT | PNGTILLHDN  | YLTTKLVEDS | 90  |
| AA18D | .....         | .....       | .....       | .....      | .....       | .....       | .....      | .....F..... | .....      | 90  |
| C4A   | .....         | .....       | .....N..... | .....      | .....       | .....       | .....      | .....       | .....      | 90  |
| C4B   | .....         | .....       | .....N..... | .....      | .....       | .....       | .....      | .....       | .....      | 90  |
| C4C   | .....         | .....       | .....       | .....      | .....M..... | .....       | .....      | .....       | .....      | 90  |
| C4D   | .....         | .....       | .....       | .....      | .....       | .....       | .....      | .....       | .....      | 89  |
| G4    | .....         | .....F..... | .....       | .....      | .....       | .....       | .....      | .....F..... | .....      | 90  |
| K181  | .....         | .....       | .....       | .....      | .....       | .....       | .....      | .....       | .....      | 90  |
| NO7   | .....         | .....       | .....       | .....      | .....       | .....       | .....      | .....F..... | .....      | 90  |
| N1    | .....         | .....       | .....       | .....      | .....M..... | .....       | .....      | .....       | .....      | 89  |
| WP15B | .....         | .....       | .....N..... | .....      | .....       | .....       | .....      | .....       | .....      | 90  |
|       |               | 100         |             | 120        |             | 140         |            | 160         |            | 180 |
| Smith | STGKRHRRLS    | FRDPEFEKRH  | PCLYCERPGD  | SMDMERCLMC | KDTTMAVLLK  | DLHTPKRRDF  | SPMLVRATVE | TVNHRPYFTC  | RFRVTPDTQK | 180 |
| AA18D | .....W.....   | .....       | .....       | .....      | .....V..... | .....S..... | .....      | .....Q..... | .....      | 180 |
| C4A   | .....         | .....       | .....       | .....      | .....       | .....S..... | .....      | .....Q..... | .....      | 180 |
| C4B   | .....         | .....       | .....       | .....      | .....       | .....S..... | .....      | .....Q..... | .....      | 180 |
| C4C   | .....         | .....       | .....       | .....      | .....       | .....S..... | .....      | .....Q..... | .....      | 180 |
| C4D   | .....W.H..... | .....       | .....       | .....      | .....       | .....       | .....      | .....Q..... | .....      | 179 |
| G4    | .....W.....   | .....       | .....       | .....      | .....V..... | .....S..... | .....      | .....Q..... | .....      | 180 |
| K181  | .....         | .....       | .....       | .....      | .....       | .....       | .....      | .....       | .....      | 180 |
| NO7   | .....         | .....       | .....       | .....      | .....V..... | .....S..... | .....      | .....Q..... | .....      | 180 |
| N1    | .....W.H..... | .....       | .....       | .....      | .....V..... | .....S..... | .....      | .....Q..... | .....      | 179 |
| WP15B | .....         | .....       | .....       | .....      | .....V..... | .....S..... | .....      | .....Q..... | .....      | 180 |
|       |               | 200         |             | 220        |             | 240         |            | 260         |            | 270 |
| Smith | IETAWLNDDC    | TFGAKTKDPI  | EACAKTASYK  | KSIREGRYVT | MSAKVKPGDP  | RTCRCVLLKT  | DNKYVLMARP | CLTDKRHQEY  | IRNVRIVHAL | 270 |
| AA18D | .....         | .....       | .....       | .....      | .....       | .....       | .....      | .....R..... | .....      | 270 |
| C4A   | .....E.....   | .....       | .....V..... | .....      | .....       | .....       | .....      | .....R..... | .....      | 270 |
| C4B   | .....E.....   | .....       | .....V..... | .....      | .....       | .....       | .....      | .....R..... | .....      | 270 |
| C4C   | .....         | .....       | .....D..... | .....      | .....       | .....       | .....      | .....R..... | .....      | 270 |
| C4D   | .....         | .....       | .....       | .....      | .....       | .....       | .....      | .....R..... | .....      | 269 |
| G4    | .....         | .....       | .....       | .....      | .....       | .....       | .....      | .....R..... | .....      | 270 |
| K181  | .....         | .....       | .....       | .....      | .....       | .....       | .....      | .....R..... | .....      | 270 |
| NO7   | .....E.....   | .....       | .....       | .....      | .....       | .....       | .....      | .....R..... | .....      | 270 |
| N1    | .....E.....   | .....       | .....       | .....      | .....       | .....       | .....      | .....R..... | .....      | 269 |
| WP15B | .....         | .....       | .....       | .....      | .....       | .....       | .....      | .....R..... | .....      | 270 |
|       |               | 280         |             | 300        |             |             |            |             |            |     |
| Smith | VISWAVAIA     | LVGFAAVRL   | LSLDSVARLV  | KKMFAAGYRR | LS*         |             |            |             |            | 313 |
| AA18D | .....         | .....       | .....       | .....      | .....       | .....       | .....      | .....       | .....      | 313 |
| C4A   | .....         | .....       | .....       | .....      | .....       | .....       | .....      | .....       | .....      | 313 |
| C4B   | .....         | .....       | .....       | .....      | .....       | .....       | .....      | .....       | .....      | 313 |
| C4C   | .....         | .....       | .....       | .....      | .....       | .....       | .....      | .....       | .....      | 313 |
| C4D   | .....         | .....       | .....       | .....      | .....       | .....       | .....      | .....       | .....      | 312 |
| G4    | .....         | .....       | .....       | .....      | .....       | .....       | .....      | .....       | .....      | 313 |
| K181  | .....         | .....       | .....       | .....      | .....       | .....       | .....      | .....       | .....      | 313 |
| NO7   | .....         | .....       | .....       | .....      | .....       | .....       | .....      | .....       | .....      | 313 |
| N1    | .....         | .....       | .....       | .....      | .....       | .....       | .....      | .....       | .....      | 312 |
| WP15B | .....         | .....       | .....       | .....      | .....       | .....       | .....      | .....       | .....      | 313 |

**Supplementary Figure 5. Conservation of *sgg1* sequences in MCMV.** The canonical two exon *sgg1* gene is conserved across all MCMV strains sequenced to date, encoding a predicted protein of 311 or 312 AA. Sequences are highly conserved at the AA level and range from 100% sequence identity (C4A versus C4B) and 97.12% sequence similarity (N1 versus Smith). Red box denotes boundary of exon 2.
